# Supplementary material for: Factor XIII activity mediates red blood cell retention in venous thrombi
Source: JCI journal article supplement (doi:10.1172/jci75386), 2014-07-01
Supplement: sd1 [file 1]

## Supplementary Figures for “Factor XIII mediates red blood cell retention in venous thrombi”

by Aleman et al.

### Supplemental Figure 1

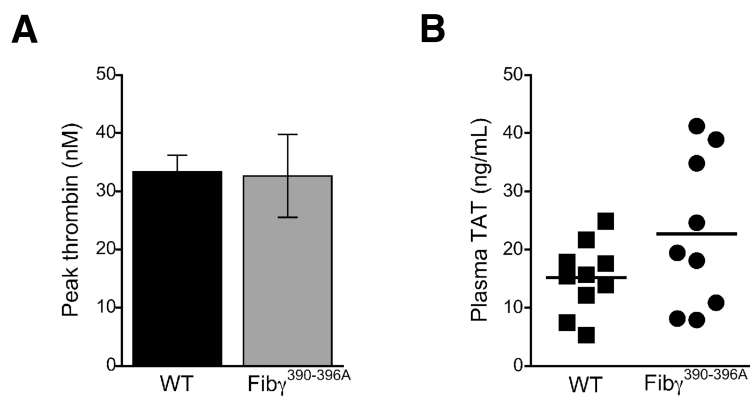

**Supplemental Figure 1. Procoagulant activity is normal in  $Fib\gamma^{390-396A}$  mice.** (A) *Ex vivo* peak thrombin generation in plasmas from WT and  $Fib\gamma^{390-396A}$  mice (n=6). Data are means  $\pm$  SEM. (B) Circulating thrombin-antithrombin (TAT) complex levels in WT and  $Fib\gamma^{390-396A}$  mice following thrombus formation (stasis model). Each dot represents an individual mouse. Lines are means.

## Supplemental Figure 2

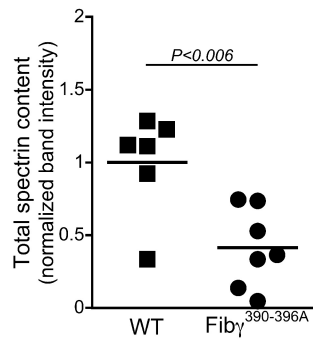

**Supplemental Figure 2. Thrombi from Fib $\gamma^{390-396A}$  mice have lower erythrocyte spectrin  $\alpha 1$  levels.**

Relative level of erythrocyte spectrin  $\alpha 1$  levels in WT and Fib $\gamma^{390-396A}$  thrombus lysates. Each dot represents an individual mouse. Lines are means.

### Supplemental Figure 3

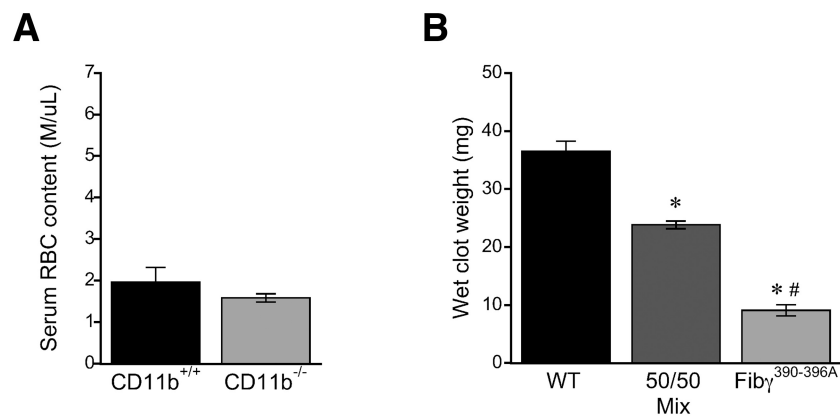

**Supplemental Figure 3. CD11b is not involved in RBC retention and a 50/50 mix of WT and Fibγ<sup>390-396A</sup> blood has an intermediate phenotype.** (A) Serum RBC content following thrombin-initiated clot retraction of re-calcified *CD11b*<sup>-/-</sup> whole blood (n=4). Data are means ± SEM. (B) Wet clot weight of fully retracted clots from WT and Fibγ<sup>390-396A</sup> blood mixed in equal parts. Data are means ± SEM. \**P*<0.002 versus WT and #*P*<0.0005 versus 50/50 mix by ANOVA with Bonferroni post hoc test.

### Supplemental Figure 4

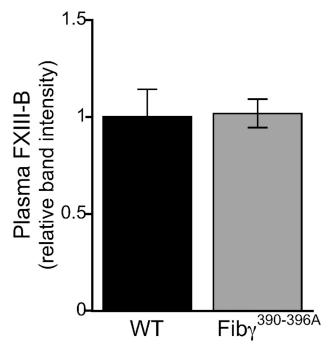

**Supplemental Figure 4. Fib $\gamma^{390-396A}$  mice have normal plasma FXIII-B levels.** Relative level of FXIII-B in WT and Fib $\gamma^{390-396A}$  plasmas. Data are means  $\pm$  SEM (n=4).

### Supplemental Figure 5

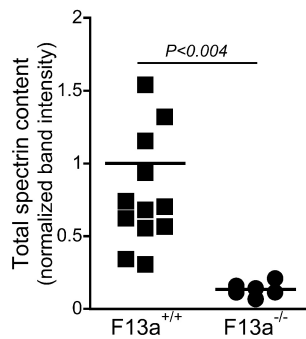

**Supplemental Figure 5. Thrombi from *F13a*<sup>-/-</sup> mice have lower erythrocyte spectrin  $\alpha$ 1 levels.**

Relative level of erythrocyte spectrin  $\alpha$ 1 levels in *F13a*<sup>+/+</sup> and *F13a*<sup>-/-</sup> thrombus lysates. Each dot represents an individual mouse. Lines are means.

### Supplemental Figure 6

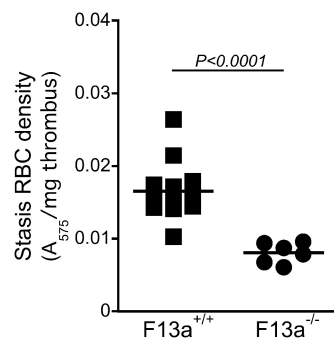

**Supplemental Figure 6. Thrombi from  $F13a^{-/-}$  mice have reduced RBC density.** Thrombus RBC content per mg thrombus. Each dot represents an individual mouse. Lines are means.
